# Supplementary material
Source: publisher site journal article supplement (https://www.dovepress.com/get_supplementary_file.php?f=Appendix%202.pdf)
Supplement: Supplementary file 1 [file get_supplementary_file.php]

Progesterone Study:

# Supplemental Progesterone Questionnaire: 35-37 Weeks

ID Sticker HERE

TODAY'S DATE (D/M/Y): \_\_\_\_ / \_\_\_\_ / \_\_\_\_

PATIENT'S STUDY NUMBER: 14 - \_\_\_\_ - \_\_\_\_ PATIENT NAME: \_\_\_\_\_

| Patient's Perception of Risk of Adverse Birth Outcomes                                                                                                      |                                                                                                                                                               |
|-------------------------------------------------------------------------------------------------------------------------------------------------------------|---------------------------------------------------------------------------------------------------------------------------------------------------------------|
| <b>Q1.</b> Do you think <b>pre-term delivery</b> (before 37 weeks/9 months) is a serious concern for the health/survival of an infant, <u>in general</u> ?  | <input type="checkbox"/> 1 = Yes      Why/Any Comments: _____<br><input type="checkbox"/> 2 = No      _____<br><input type="checkbox"/> 9 = Unsure      _____ |
| <b>Q2.</b> Do you think <b>low-birth weight</b> (less than 2.5 kg) is a serious concern for the health/survival of an infant, <u>in general</u> ?           | <input type="checkbox"/> 1 = Yes      Why/Any Comments: _____<br><input type="checkbox"/> 2 = No      _____<br><input type="checkbox"/> 9 = Unsure      _____ |
| <b>Q3.</b> <u>For you personally</u> , have you ever had concerns that you might have a baby that could be <b>born early</b> (before 37 weeks/9 months)?    | <input type="checkbox"/> 1 = Yes      Why/Any Comments: _____<br><input type="checkbox"/> 2 = No      _____<br><input type="checkbox"/> 9 = Unsure      _____ |
| <b>Q4.</b> <u>For you personally</u> , have you ever had concerns that you might have a baby that could be born <b>low birth weight</b> (less than 2.5 kg)? | <input type="checkbox"/> 1 = Yes      Why/Any Comments: _____<br><input type="checkbox"/> 2 = No      _____<br><input type="checkbox"/> 9 = Unsure      _____ |

| Past Experience Taking Progesterone Medication                                                                                               |                                                                                                                                                                                                                                                                                                                 |
|----------------------------------------------------------------------------------------------------------------------------------------------|-----------------------------------------------------------------------------------------------------------------------------------------------------------------------------------------------------------------------------------------------------------------------------------------------------------------|
| <b>Q5.</b> Has the patient ever taken progesterone medication before <i>any</i> reason such as birth control, preventing miscarriages, etc.? | <input type="checkbox"/> 1 = Yes<br><input type="checkbox"/> 2 = No<br><input type="checkbox"/> 9 = Unsure                                                                                                                                                                                                      |
| <b>Q5a.</b> If yes, for what reason was progesterone taken?                                                                                  | <input type="checkbox"/> 1 = Birth Control <input type="checkbox"/> 2 = Prevent miscarriages<br><input type="checkbox"/> 3 = Other (Specify): _____                                                                                                                                                             |
| IF YES TO THE ABOVE Q5., PLEASE ANSWER THE FOLLOWING QUESTIONS:                                                                              |                                                                                                                                                                                                                                                                                                                 |
| <b>Q5b.</b> By what route of administration did they previously take progesterone? (Check all that apply.)                                   | <input type="checkbox"/> 1 = Mouth-Tablet <input type="checkbox"/> 3 = Vaginal-Tablet<br><input type="checkbox"/> 2 = Intramuscular Injection <input type="checkbox"/> 4 = Vaginal-Gel                                                                                                                          |
| <b>Q5c.</b> What was the frequency and duration for taking the progesterone medication in the past?                                          | _____ times per _____ (day/week/month)<br>For _____ (days/weeks/months)                                                                                                                                                                                                                                         |
| <b>Q5d.</b> Where did the patient take the progesterone medication?                                                                          | <input type="checkbox"/> 1 = At home (Self Administered)<br><input type="checkbox"/> 2 = At a health clinic<br><input type="checkbox"/> 3 = At a bigger medical centre or hospital<br><input type="checkbox"/> 4 = Other (Specify): _____                                                                       |
| <b>Q5e.</b> Check <b>ALL</b> concerns or problems associated with taking the progesterone medication in the past. (Check all that apply.)    | <input type="checkbox"/> 1 = No concerns or problems<br><input type="checkbox"/> 2 = Health Concerns (Specify): _____<br><input type="checkbox"/> 3 = Financial Concerns (Specify): _____<br><input type="checkbox"/> 4 = Inconvenience (Specify): _____<br><input type="checkbox"/> 5 = Other (Specify): _____ |

| <b>Future Willingness to Take Progesterone Medication</b>                                                                                                                                                                         |                                                                                                       |
|-----------------------------------------------------------------------------------------------------------------------------------------------------------------------------------------------------------------------------------|-------------------------------------------------------------------------------------------------------|
| <b>Q6. For a future pregnancy</b> , if there was a medicine you could take that would <b>prevent your baby from being born early</b> , and <b>ensure your baby is not low birth weight</b> , would you <i>consider</i> taking it? | <input type="checkbox"/> 1 = Yes<br><input type="checkbox"/> 2 = No<br>If NO, why not? _____<br>_____ |

**IF NO TO THE ABOVE QUESTION, PLEASE PROCEED TO Q10 (THE LAST QUESTION).  
 IF YES (PATIENT WOULD CONSIDER TAKING MEDICATION DURING PREGNANCY), PLEASE CONTINUE:**

**BY MOUTH – TABLET:**

|                                                                                                                                                                                                                       |                                                                                                                                                                                                                                           |
|-----------------------------------------------------------------------------------------------------------------------------------------------------------------------------------------------------------------------|-------------------------------------------------------------------------------------------------------------------------------------------------------------------------------------------------------------------------------------------|
| <b>Q7.</b> If a doctor or a nurse prescribed/recommended taking the medicine by <b>MOUTH</b> (i.e. swallowing a tablet) to prevent preterm delivery or low birth weight, would the patient <i>consider</i> taking it? | <input type="checkbox"/> 1 = Yes <input type="checkbox"/> 2 = No<br>If NO, why not? _____<br>_____                                                                                                                                        |
| <b>IF YES TO Q7, (PATIENT WOULD CONSIDER TAKING MEDICINE BY MOUTH), PLEASE ANSWER 7a-e:</b>                                                                                                                           |                                                                                                                                                                                                                                           |
| <b>Q7a.</b> Would the patient be willing to take the medicine by mouth <b>once each day</b> ?                                                                                                                         | <input type="checkbox"/> 1 = Yes <input type="checkbox"/> 2 = No<br>If NO, why not? _____                                                                                                                                                 |
| <b>Q7b.</b> Would the patient be willing to take the medicine by mouth from Month 5 up to Month 9 of pregnancy (approximately half of the pregnancy)?                                                                 | <input type="checkbox"/> 1 = Yes <input type="checkbox"/> 2 = No<br>If NO, why not? _____                                                                                                                                                 |
| <b>Q7c.</b> Where are <b>ALL</b> the places that the patient would be willing to take the medicine by mouth? (Check ALL that apply.)                                                                                  | <input type="checkbox"/> 1 = At home (Self-Administered)<br><input type="checkbox"/> 2 = At a health clinic<br><input type="checkbox"/> 3 = At a bigger medical centre or hospital<br><input type="checkbox"/> 4 = Other (Specify): _____ |
| <b>Q7d.</b> Does the patient have any HEALTH concerns related to taking this medicine by mouth?                                                                                                                       | <input type="checkbox"/> 1 = Yes <input type="checkbox"/> 2 = No<br>If YES, please describe: _____<br>_____                                                                                                                               |
| <b>Q7e.</b> Does the patient have any OTHER concerns (e.g. financial, inconvenience, etc.) associated with taking the medicine by mouth?                                                                              | <input type="checkbox"/> 1 = Yes <input type="checkbox"/> 2 = No<br>If YES, please describe: _____<br>_____                                                                                                                               |

**BY INTRAMUSCULAR INJECTION:**

|                                                                                                                                                                                                       |                                                                                                    |
|-------------------------------------------------------------------------------------------------------------------------------------------------------------------------------------------------------|----------------------------------------------------------------------------------------------------|
| <b>Q8.</b> If a doctor or a nurse prescribed/recommended taking the medicine by <b>INTRAMUSCULAR INJECTION</b> to prevent preterm delivery or low birth weight, would the patient consider taking it? | <input type="checkbox"/> 1 = Yes <input type="checkbox"/> 2 = No<br>If NO, why not? _____<br>_____ |
| <b>ONLY IF YES TO Q8, (PATIENT WOULD CONSIDER TAKING MEDICINE BY INJECTION), PLEASE ANSWER 8a-e:</b>                                                                                                  |                                                                                                    |
| <b>Q8a.</b> Would the patient be willing to take the medicine by injection <b>once each week</b> ?                                                                                                    | <input type="checkbox"/> 1 = Yes <input type="checkbox"/> 2 = No<br>If NO, why not? _____          |
| <b>Q8b.</b> Would the patient be willing to take the medicine by injection from Month 5 up to Month 9 of pregnancy (approximately half of the pregnancy)?                                             | <input type="checkbox"/> 1 = Yes <input type="checkbox"/> 2 = No<br>If NO, why not? _____          |

|                                                                                                                                              |                                                                                                                                                                                                                                           |
|----------------------------------------------------------------------------------------------------------------------------------------------|-------------------------------------------------------------------------------------------------------------------------------------------------------------------------------------------------------------------------------------------|
| <b>Q8c.</b> Where are <b>ALL</b> the places that the patient would be willing to take the medicine by injection? (Check ALL that apply.)     | <input type="checkbox"/> 1 = At home (Self-Administered)<br><input type="checkbox"/> 2 = At a health clinic<br><input type="checkbox"/> 3 = At a bigger medical centre or hospital<br><input type="checkbox"/> 4 = Other (Specify): _____ |
| <b>Q8d.</b> Does the patient have any HEALTH concerns related to taking this medicine by injection?                                          | <input type="checkbox"/> 1 = Yes <input type="checkbox"/> 2 = No<br>If YES, please describe: _____<br>_____                                                                                                                               |
| <b>Q8e.</b> Does the patient have any OTHER concerns (e.g. financial, inconvenience, etc.) associated with taking the medicine by injection? | <input type="checkbox"/> 1 = Yes <input type="checkbox"/> 2 = No<br>If YES, please describe: _____<br>_____                                                                                                                               |

**VAGINALLY:**

|                                                                                                                                                                                                                       |                                                                                                                                                                                                                                                                                                                                                   |
|-----------------------------------------------------------------------------------------------------------------------------------------------------------------------------------------------------------------------|---------------------------------------------------------------------------------------------------------------------------------------------------------------------------------------------------------------------------------------------------------------------------------------------------------------------------------------------------|
| <b>Q9.</b> If a doctor or a nurse prescribed/recommended taking the medicine <b><u>VAGINALLY BY TABLET OR GEL</u></b> , to prevent preterm delivery or low birth weight, would the patient <i>consider</i> taking it? | <input type="checkbox"/> 1 = Yes to Both – Either Tablet or Gel<br>If Yes to Both, <b>which preferred:</b> _____<br><input type="checkbox"/> 2 = Only Tablet, Not Gel<br><input type="checkbox"/> 3 = Only Gel, Not Tablet<br><input type="checkbox"/> 4 = No to Both Tablet and Gel<br><br>If NO to Vaginal Tablet and/or Gel, why not?<br>_____ |
| <b>ONLY IF YES TO Q9, (PATIENT WOULD CONSIDER TAKING MEDICINE VAGINALLY, EITHER TABLET OR GEL), PLEASE ANSWER 9a-e:</b>                                                                                               |                                                                                                                                                                                                                                                                                                                                                   |
| <b>Q9a.</b> Would the patient be willing to take the medication vaginally once each day?                                                                                                                              | <input type="checkbox"/> 1 = Yes <input type="checkbox"/> 2 = No<br>If NO, why not? _____                                                                                                                                                                                                                                                         |
| <b>Q9b.</b> Would the patient be willing to take the medication vaginally from Month 5 to Month 9 of pregnancy (approximately half of the pregnancy)?                                                                 | <input type="checkbox"/> 1 = Yes <input type="checkbox"/> 2 = No<br>If NO, why not? _____                                                                                                                                                                                                                                                         |
| <b>Q9c.</b> Where are <b>ALL</b> the places that the patient would be willing to take the medicine vaginally? (Check ALL that apply.)                                                                                 | <input type="checkbox"/> 1 = At home (Self-Administered)<br><input type="checkbox"/> 2 = At a health clinic<br><input type="checkbox"/> 3 = At a bigger medical centre or hospital<br><input type="checkbox"/> 4 = Other (Specify): _____                                                                                                         |
| <b>Q9d.</b> Does the patient have any HEALTH concerns related to taking this medicine vaginally?                                                                                                                      | <input type="checkbox"/> 1 = Yes <input type="checkbox"/> 2 = No<br>If YES, please describe: _____<br>_____                                                                                                                                                                                                                                       |
| <b>Q9e.</b> Does the patient have any OTHER concerns (e.g. financial, inconvenience, etc.) associated with taking the medicine vaginally?                                                                             | <input type="checkbox"/> 1 = Yes <input type="checkbox"/> 2 = No<br>If YES, please describe: _____<br>_____                                                                                                                                                                                                                                       |

ANSWER THIS QUESTION FOR ALL WOMEN IN THE STUDY:

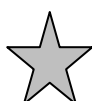

**Q10.** Which form of supplemental progesterone would you be most likely to accept/prefer taking:

**IF YOU HAD TO CHOOSE JUST ONE:**

1 = Intramuscular Injection

2 = Vaginal-Tablet

3 = Vaginal-Gel
